# Supplementary material for: Mlig-SKP1 Gene Is Required for Spermatogenesis in the Flatworm Macrostomum lignano
Source: MDPI journal article supplement (doi:10.3390/ijms232315110), 2022-12-01
Supplement: s1 [file s1]

**Supplementary Materials file** for «*Mlig-SKP1* gene is required for spermatogenesis in the flatworm *Macrostomum lignano*»

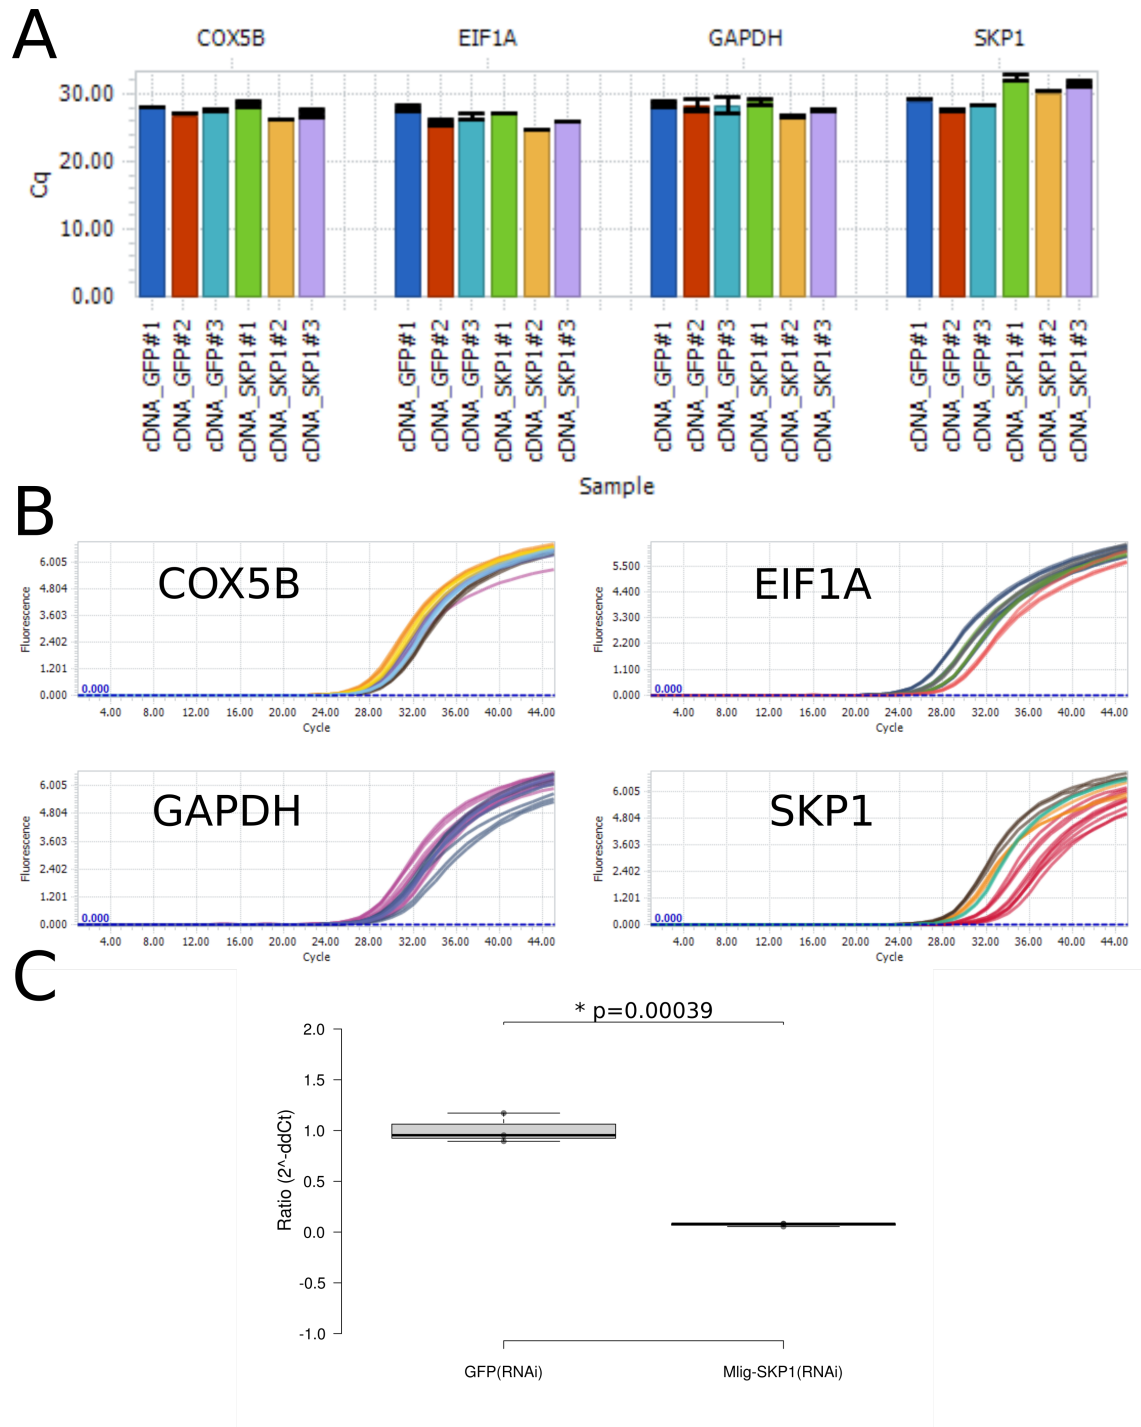

Figure S1. Verification of *Mlig-SKP1* knockdown by qRT-PCR. House-keeping genes *COX5B*, *GAPDH*, and *EIF1A* were used as controls. A - Bar-plots comparing raw *Mlig-SKP1* levels in knocked down worms and GFP knocked down worms as controls. For each of genes there are 3 repeats from different wells with worms treated with dsRNA against *GFP* or *Mlig-SKP1*. B - fluorescent curves for *COX5B*, *EIF1A*, *GAPDH* and *SKP1* replicas; C - Decrease of *Mlig-SKP1* transcript levels as a result of knockdown estimated using ddCt method. The blue bar is a relative mRNA level in the control samples, the orange bar - in *Mlig-SKP1*(RNAi) samples.

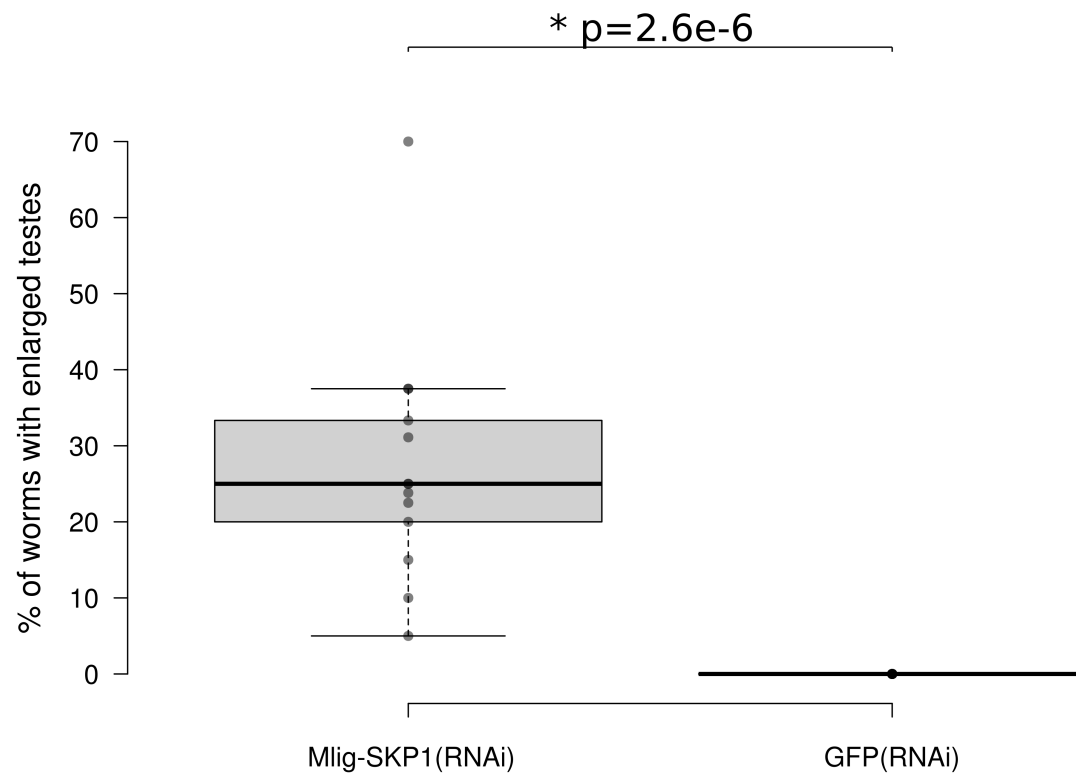

Figure S2. Number of worms with enlarged testes in *Mlig-SKP1(RNAi)* and *GFP(RNAi)* worms.

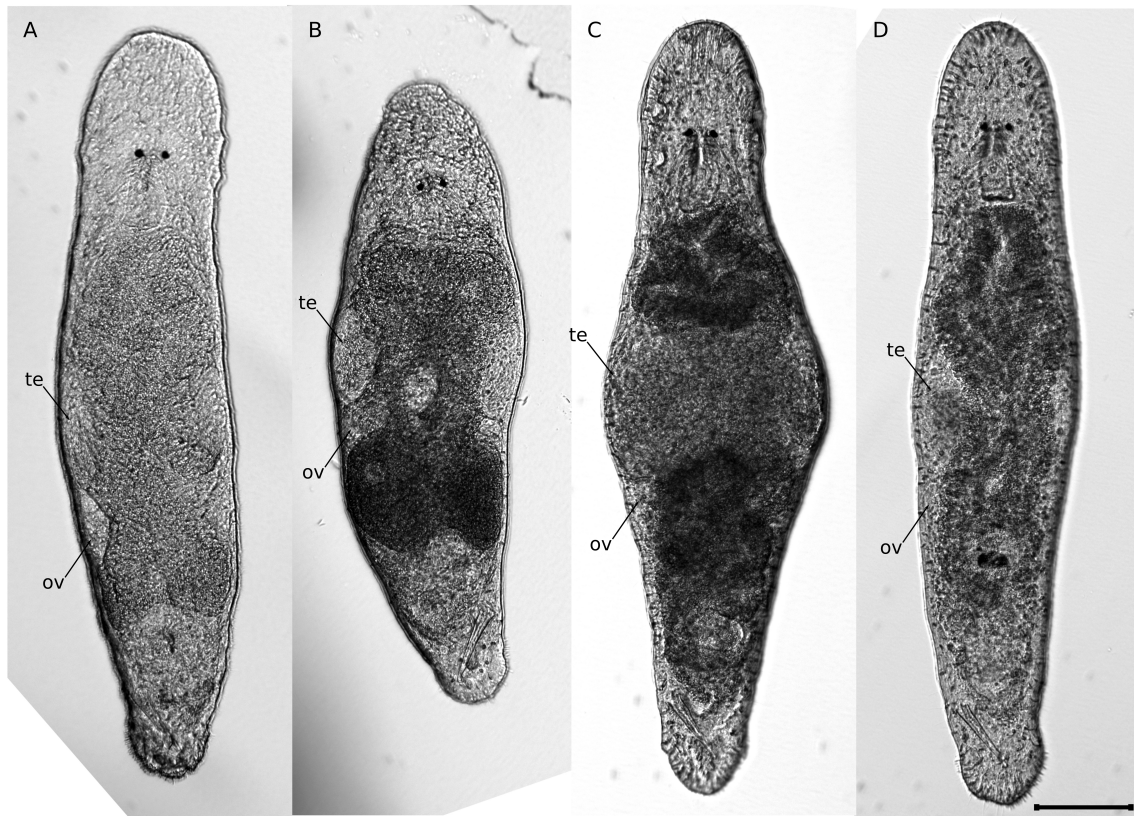

Figure S3. Variability of the testes size after *Mlig-SKP1* RNAi knockdown. A. A worm showing normal-sized testes. B. Small but abnormal testes become visually well-differentiated. C. A strong phenotype with enlarged testes. D. A phenotype after decreasing of the testes volume. Scale bar is 100  $\mu$ m. Te-testes, ov – ovaries.

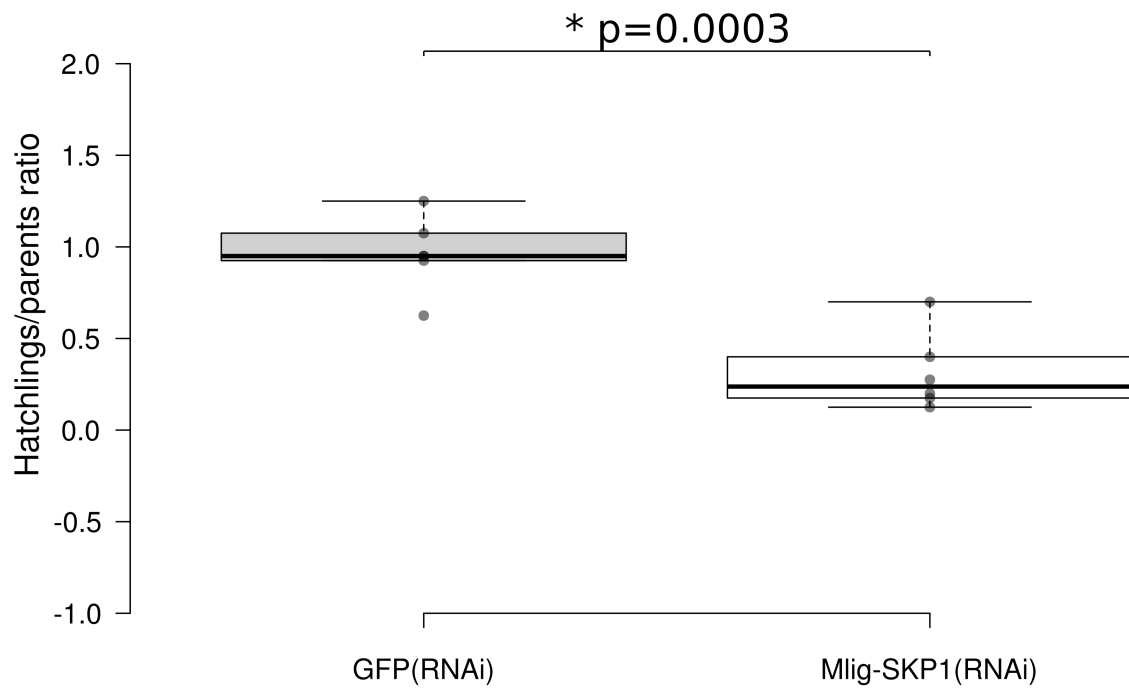

Figure S4. Effect of *Mlig-SKP1* RNAi knockdown on fertility in *M. lignano*.



Table S1. Primers used in the current project.

| Primer Name     | Primer Length (bp) | Seq (5' -> 3')           | cDNA PCR product size (bp) |
|-----------------|--------------------|--------------------------|----------------------------|
| For cloning     |                    |                          |                            |
| SKP1_RT-PCR_fwd | 22                 | AGTCTCTGATGACTCCGATGAC   | 568                        |
| SKP1_RT-PCR_rev | 20                 | AGAACAGCTGAGGCGATACA     |                            |
| For qPCR        |                    |                          |                            |
| SKP1_qPCR_fwd   | 21                 | CACAGCTATCCAACCAGAGAG    | 126                        |
| SKP1_qPCR_rev   | 19                 | GGTCCTCAAGCATGGTCTT      |                            |
| COX5B_qPCR_fwd  | 22                 | CACAGTCACTATCGTCAGGTTG   | 95                         |
| COX5B_qPCR_rev  | 21                 | CCGCAGTAGCACCTTTGATTA    |                            |
| EIF1A_qPCR_fwd  | 23                 | CGATGCCGAAGAATAAAGGAAAG  | 103                        |
| EIF1A_qPCR_rev  | 20                 | TCCTGACCATCCTCCTTGTA     |                            |
| GAPDH_qPCR_fwd  | 20                 | GGGCGTCAATGAGGATTCTT     | 97                         |
| GAPDH_qPCR_rev  | 24                 | CGAATTCGTTGTTGATCACCTTAG |                            |
